# Supplementary material for: (Pd–CuCl2)/γ-Al2O3: a high-performance catalyst for carbonylation of methyl nitrite to dimethyl carbonate
Source: Royal Society of Chemistry journal article supplement (doi:10.1039/c5cy00251f), 2015-01-01

## Supporting Information

### **(Pd-CuCl<sub>2</sub>)/ $\gamma$ -Al<sub>2</sub>O<sub>3</sub>: a high-performance catalyst for carbonylation of methyl nitrite to dimethyl carbonate**

**Dong-Mei Lv,<sup>a,b</sup> Zhong-Ning Xu,<sup>\*a</sup> Si-Yan Peng,<sup>a</sup> Zhi-Qiao Wang,<sup>a</sup> Qing-Song Chen,<sup>a</sup>  
Yumin Chen,<sup>a</sup> Guo-Cong Guo<sup>\*a</sup>**

<sup>a</sup> *State Key Laboratory of Structural Chemistry, Fujian Institute of Research on the  
Structure of Matter, Chinese Academy of Sciences, Fuzhou, Fujian 350002, P. R.  
China*

<sup>b</sup> *Key Laboratory of Coal to Ethylene Glycol and Its Related Technology, Chinese  
Academy of Sciences, Fuzhou, Fujian 350002, P. R. China*

*\* To whom correspondence should be addressed: E-mail: [gcguo@fjirsm.ac.cn](mailto:gcguo@fjirsm.ac.cn),  
[znxu@fjirsm.ac.cn](mailto:znxu@fjirsm.ac.cn); Fax: +86-591-83714946; Tel: +86-591-83512502*

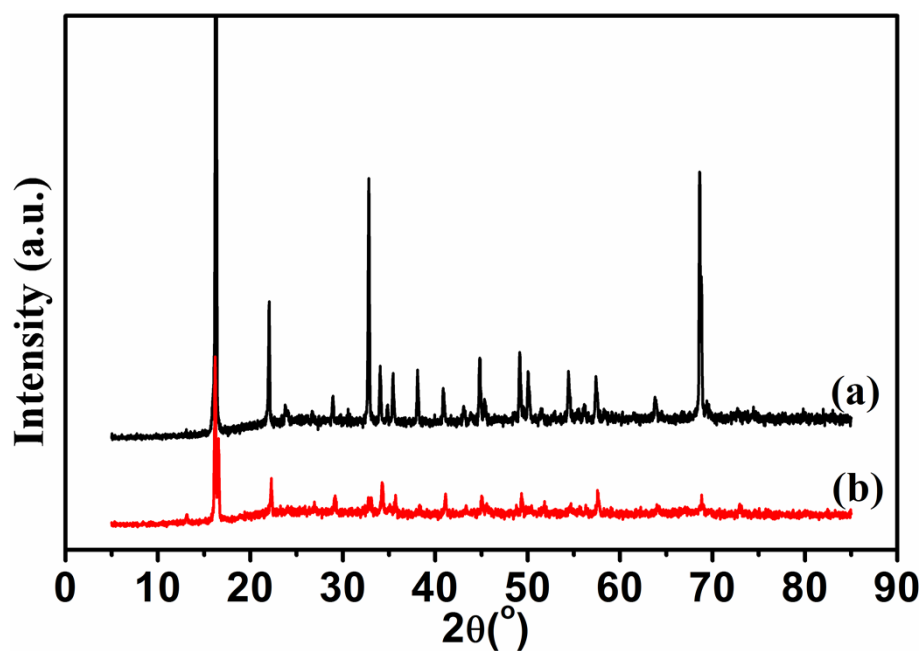

**Fig. S1.** XRD patterns of (a)  $\text{CuCl}_2$  and (b)  $(\text{Pd-CuCl}_2)/\gamma\text{-Al}_2\text{O}_3$  catalyst.

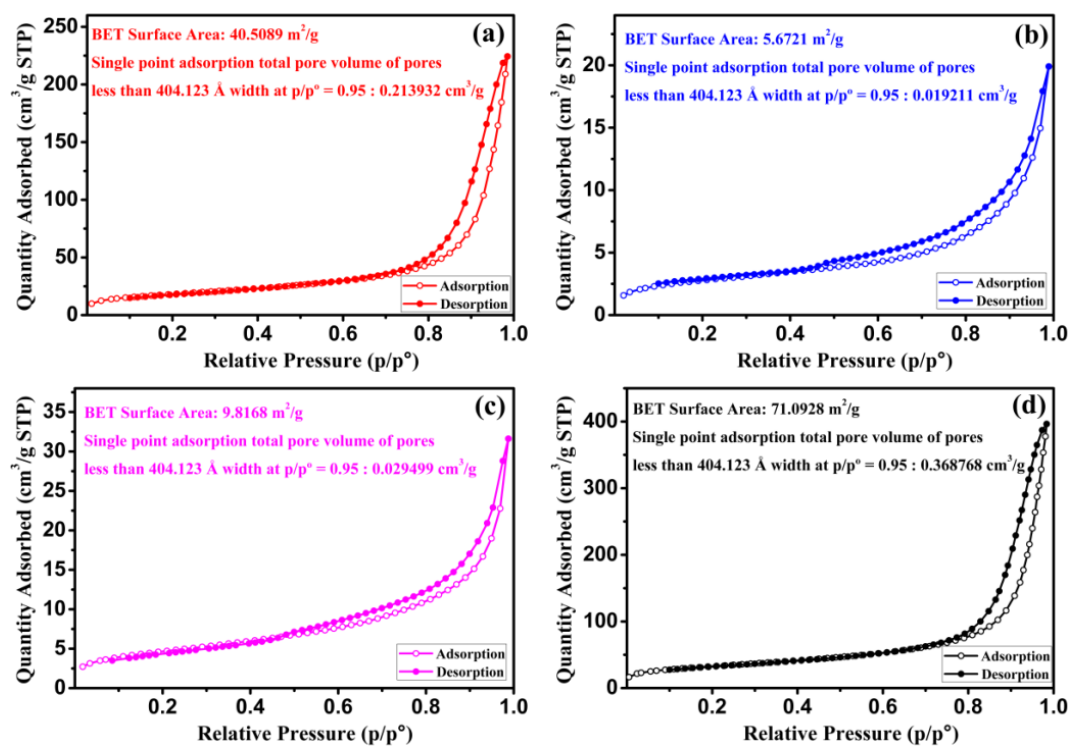

**Fig. S2.** Nitrogen adsorption-desorption isotherms of (a)  $(\text{Pd-CuCl}_2)/\gamma\text{-Al}_2\text{O}_3$  catalyst, (b)  $(\text{Pd-CuCl}_2)/\alpha\text{-Al}_2\text{O}_3$  catalyst, (c)  $(\text{Pd-CuCl}_2)/\text{MgO}$  catalyst and (d)  $\text{Pd}/\gamma\text{-Al}_2\text{O}_3$  catalyst at  $77 \text{ K}$ .

**Table S1.** The texture properties of as-synthesized catalysts with different supports.

| Catalysts                            | (Pd-CuCl <sub>2</sub> )/ $\gamma$ -Al <sub>2</sub> O <sub>3</sub> | (Pd-CuCl <sub>2</sub> )/ $\alpha$ -Al <sub>2</sub> O <sub>3</sub> | (Pd-CuCl <sub>2</sub> )/MgO | Pd/ $\gamma$ -Al <sub>2</sub> O <sub>3</sub> |
|--------------------------------------|-------------------------------------------------------------------|-------------------------------------------------------------------|-----------------------------|----------------------------------------------|
| S <sub>BET</sub> (m <sup>2</sup> /g) | 40.5                                                              | 5.7                                                               | 9.8                         | 71.1                                         |
| Pore volume (cm <sup>3</sup> /g)     | 0.21                                                              | 0.02                                                              | 0.03                        | 0.37                                         |

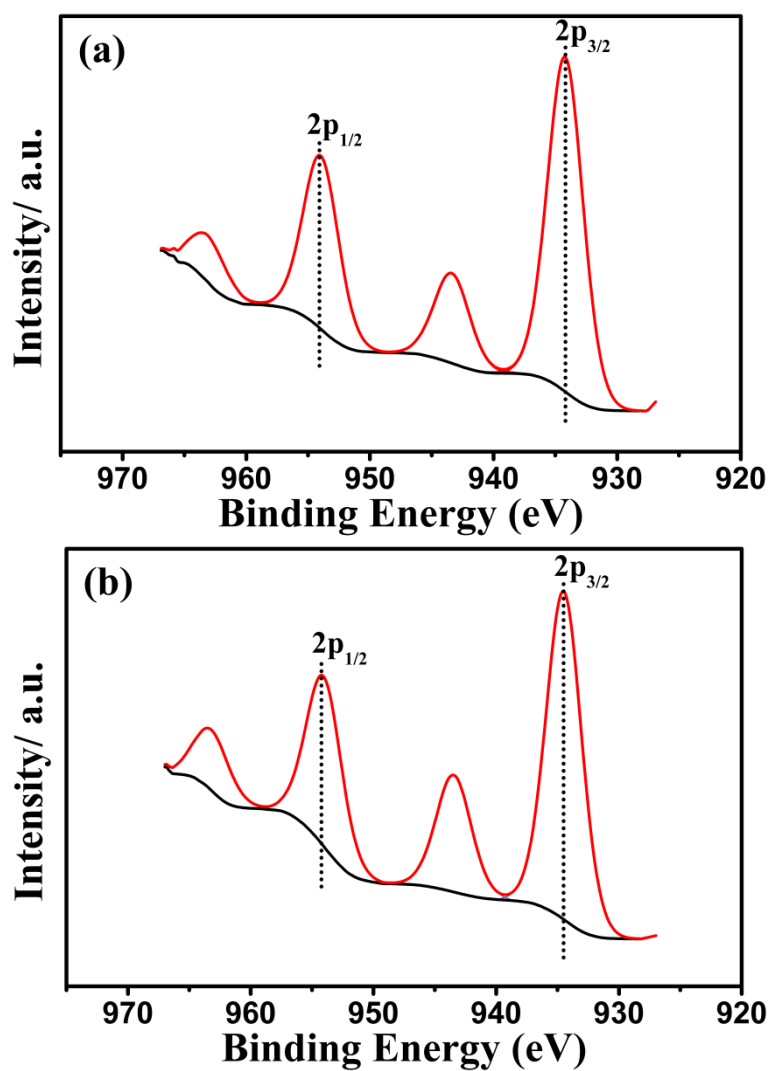

**Fig. S3.** Cu 2p XPS spectra of (a) fresh and (b) engaged of (Pd-CuCl<sub>2</sub>)/ $\gamma$ -Al<sub>2</sub>O<sub>3</sub> catalysts.

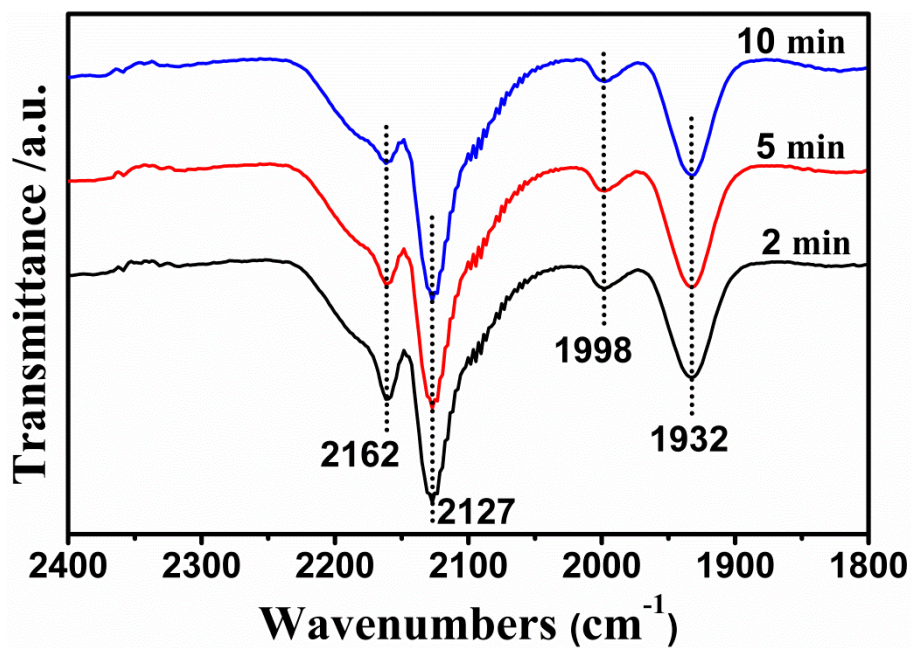

**Fig. S4.** *In situ* DRIR spectra of CO on (Pd-CuCl<sub>2</sub>)/ $\gamma$ -Al<sub>2</sub>O<sub>3</sub> catalyst at 120 °C, range from 2400 cm<sup>-1</sup> to 1800 cm<sup>-1</sup>.

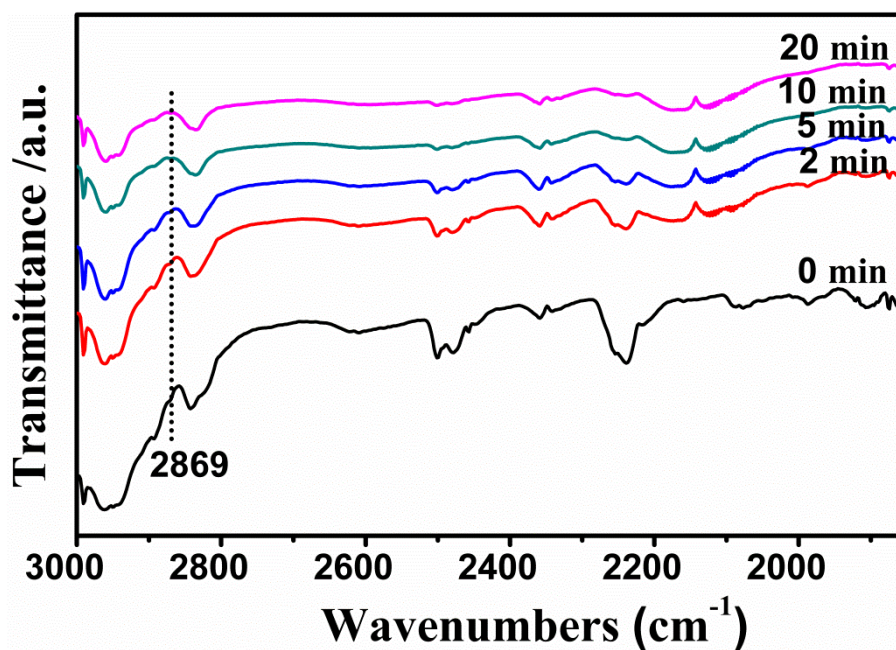

**Fig. S5.** *In situ* DRIR spectra of CO and MN on (Pd-CuCl<sub>2</sub>)/ $\gamma$ -Al<sub>2</sub>O<sub>3</sub> catalyst at 120 °C, range from 3000 to 1850 cm<sup>-1</sup>.

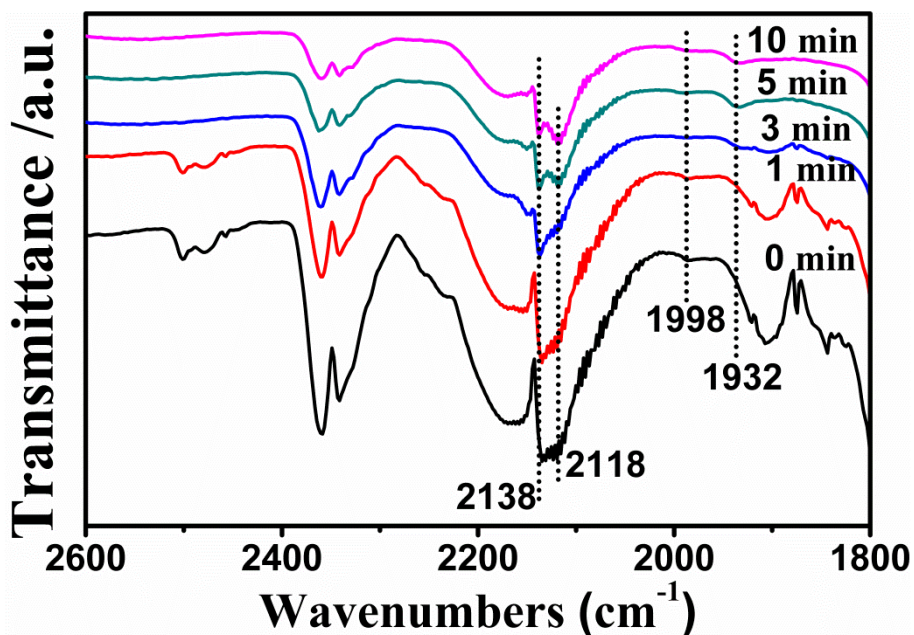

**Fig. S6.** *In situ* DRIR spectra of the reaction between CO and MN after sweeping by  $N_2$  over  $(Pd-CuCl_2)/\gamma-Al_2O_3$  catalyst at  $120\text{ }^\circ C$ , range from  $2600$  to  $1800\text{ }cm^{-1}$ .

The *in situ* DRIR spectra of the reaction between CO and MN over  $(Pd-CuCl_2)/\gamma-Al_2O_3$  catalyst after sweeping by  $N_2$  are shown in Fig. S6. The small peaks appeared at  $1998$  and  $1932\text{ }cm^{-1}$  are assigned to adsorbed CO on metallic Pd(0) in bridge ( $Pd_2-CO$ ). The large peaks at  $2118$  and  $2138\text{ }cm^{-1}$  (not the bimodal peaks of CO in gas) have been detected, which can be ascribed to the C–O stretching vibrations of CO adsorbed on Pd(II). According to the results of *in situ* DRIR experiments, most of CO are adsorbed on Pd(II), while only a few of CO are adsorbed on Pd(0) during the reaction process of CO and MN, which is consistent with the results of XPS characterization.

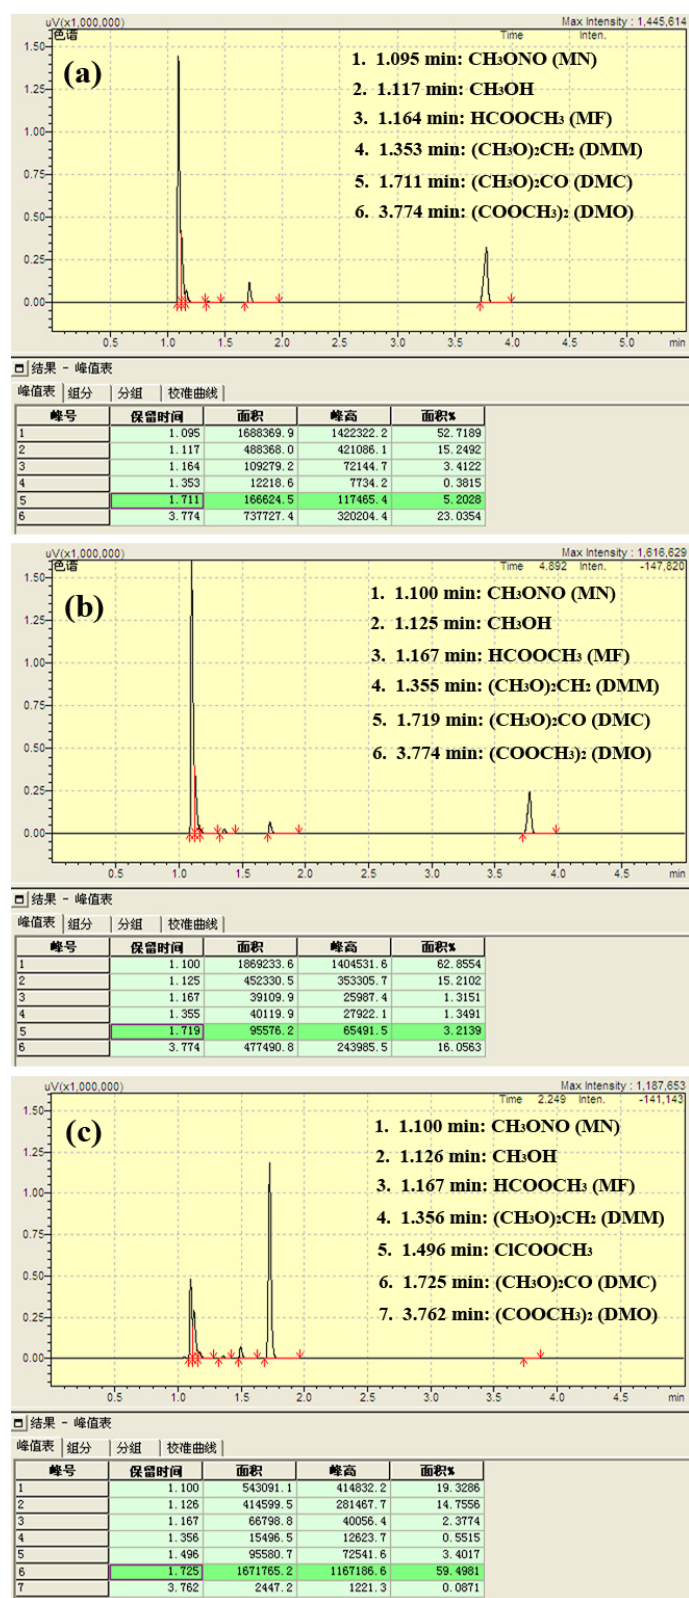

**Fig. S7.** GC diagrams on FID of methyl nitrite and organic products over (a) Pd/ $\gamma\text{-Al}_2\text{O}_3$  catalyst, (b) (Pd-CuSO<sub>4</sub>)/ $\gamma\text{-Al}_2\text{O}_3$  catalyst and (c) (Pd-CuCl<sub>2</sub>)/ $\gamma\text{-Al}_2\text{O}_3$  catalyst at 0.1 MPa and 120 °C.

The organic products over as-synthesized catalysts are methanol, methyl formate (MF), dimethoxymethane (DMM), DMC and dimethyl oxalate (DMO). The products of methanol, MF, and DMM come from the decomposition of methyl nitrite (MN) [reactions (1) and (2) shown as follows]. The products of DMC [reaction (3) shown as follows] and DMO [reaction (4) shown as follows] come from the carbonylation of MN. The selectivity to DMC is calculated based on CO. Thus, the byproduct based on CO of as-synthesized catalysts is only DMO. The selectivities to DMC over Pd/ $\gamma$ -Al<sub>2</sub>O<sub>3</sub> and (Pd-CuSO<sub>4</sub>)/ $\gamma$ -Al<sub>2</sub>O<sub>3</sub> catalysts not containing Cl<sup>-</sup> are much lower than that over (Pd-CuCl<sub>2</sub>)/ $\gamma$ -Al<sub>2</sub>O<sub>3</sub> catalyst containing Cl<sup>-</sup>, which can be directly observed in GC diagrams (Fig. S7).

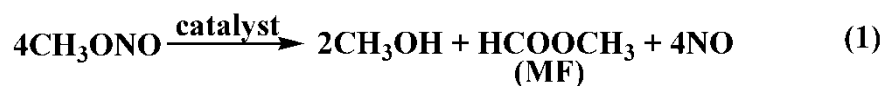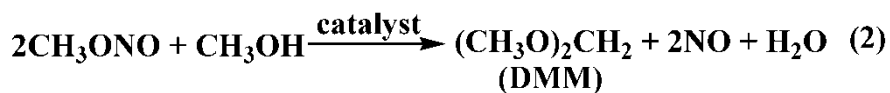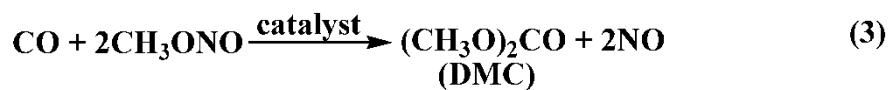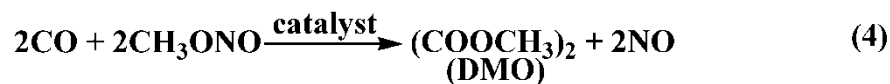

Supplement: c5cy00251f1.pdf [file c5cy00251f1.pdf]
